# Supplementary material for: Microglia‐synapse engulfment via PtdSer‐TREM2 ameliorates neuronal hyperactivity in Alzheimer's disease models
Source: PubMed Central journal article supplement (PMC10548173; doi:10.15252/embj.2022113246), 2023-08-14
Supplement: EMBJ-42-e113246-s006.pdf [file EMBJ-42-e113246-s006.pdf]

**Appendix Table of Contents**

|                                |          |
|--------------------------------|----------|
| <b>Appendix Figure S1.....</b> | <b>2</b> |
| <b>Appendix Figure S2.....</b> | <b>3</b> |
| <b>Appendix Figure S3.....</b> | <b>4</b> |

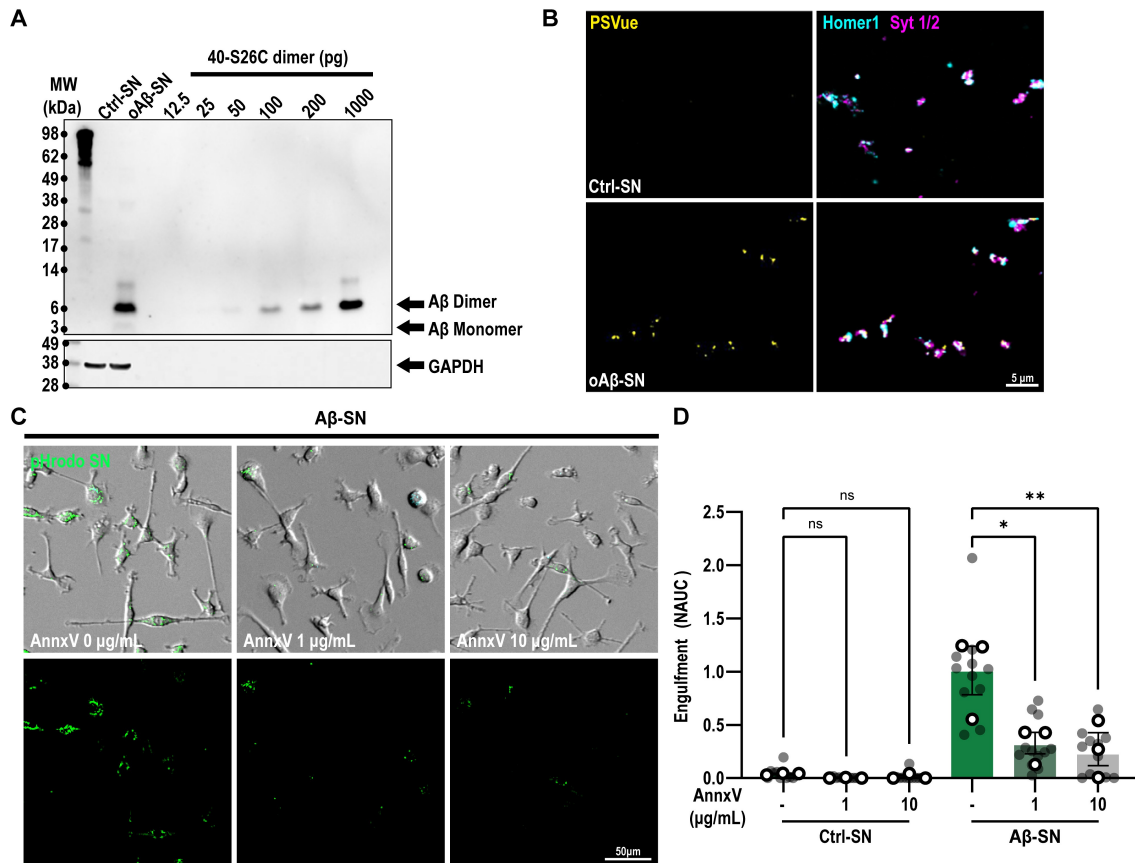

### Appendix Figure S1. Aβ oligomers induce ePtdSer on fresh mouse synaptosomes which is necessary for microglial engulfment.

**A.** Western blot validating levels of Aβ on freshly isolated synaptosomes treated with 50nM synthetic humanized Aβ oligomers 40-S26C compared to standard curve and GAPDH loading control. Aβ oligomers were mostly dimers (6.5 kDa) with some monomers (3 kDa) in Aβ-synaptosomes (Aβ-SN) with no immunoreactivity in control synaptosomes (Ctrl-SN).

**B.** Immunocytochemistry showing increased levels of ePtdSer using PSVue 643 labelling (yellow) on oAβ-SN versus control Ctrl-SN immunostained with pre- and post-synaptic Synaptotagmin 1/2 (magenta) and Homer1 (cyan) respectively. Scale bar 5 μm.

**C-D.** Microglia simultaneously treated with oAβ-synaptosomes (oAβ-SN) (green) conjugated to pHrodo red and control synaptosomes (Ctrl-SN) conjugated to pHrodo deep red pre-treated with either 0, 1 or 10 μg/mL of Annexin-V (AnnxV). Scale bar 50 μm.

**D.** pHrodo fluorescence intensity with time shown as area under curve (AUC) at 3 h. AnnxV treatment significantly decreases AUC of oAβ-SN but not Ctrl-SN. Data shown as normalized to non-treated oAβ-SN (NAUC). ~40 microglia per ROI, 2 ROIs per well, 2-3 wells per experiment, n=3 independent experiments.

Data information: Data shown as mean ± SEM. Each shaded point represents 1 ROI, and each open point represents the average per experimental replicate. Two-way ANOVA followed by Bonferroni post-hoc test. P-values shown as ns P>0.05; \*P<0.05; \*\*P<0.01.

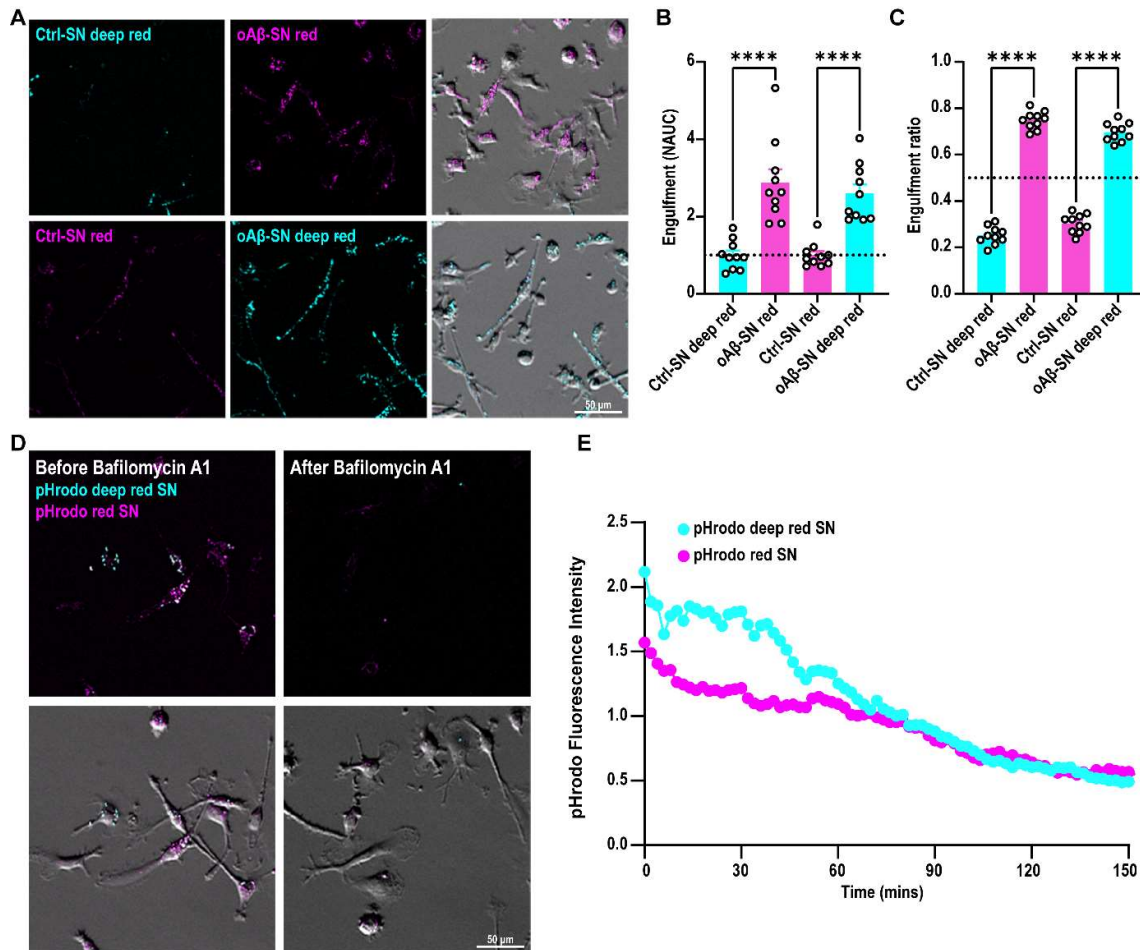

**Appendix Figure S2. Microglia preferentially engulf Aβ oligomer<sup>+</sup>-synaptosomes regardless of pHrodo dye.**

**A.** Primary microglia (P0-P4) treated with simultaneously added oAβ-synaptosomes (oAβ-SN) and control synaptosomes (Ctrl-SN). Top panel: Ctrl-SN (cyan) and oAβ-SN (magenta) conjugated to deep red and red pHrodo respectively. Bottom panel: Ctrl-SN (magenta) and oAβ-SN (cyan) conjugated to red and deep red pHrodo respectively. See movie EV1. Scale bar 20 μm

**B.** pHrodo fluorescence intensity with time shown as area under curve (AUC) at 3 h normalized to respective control (NAUC). AUC of oAβ-SN is higher than Ctrl-SN irrespective of pHrodo paradigm. 5 ROIs per experiment, from 2 experimental replicates per paradigm.

**C.** Engulfment ratio (oAβ-SN or Ctrl-SN/ total sum pHrodo fluorescence) at a single time point. 5 ROIs per experiment, from 2 experimental replicates per paradigm.

**D.** Primary microglia treated simultaneously with synaptosomes conjugated to pHrodo red (red pHrodo SN, magenta) and deep red (deep red pHrodo SN, cyan) before and after 2 h treatment with bafilomycin A1 at the end of a microglia-synaptosome engulfment experiment. Scale bar 20 μm

**E.** Bafilomycin, which prevents acidification of lysosomes, decreases pHrodo fluorescence intensity of both pHrodo red and deep red with time (2 min intervals, bafilomycin added at t=0).

Data information: Data shown as mean ± SEM. Each point represents 1 ROI. Two-way ANOVA followed by Bonferroni post-hoc test. P-values shown as \*\*\*\*P<0.001.

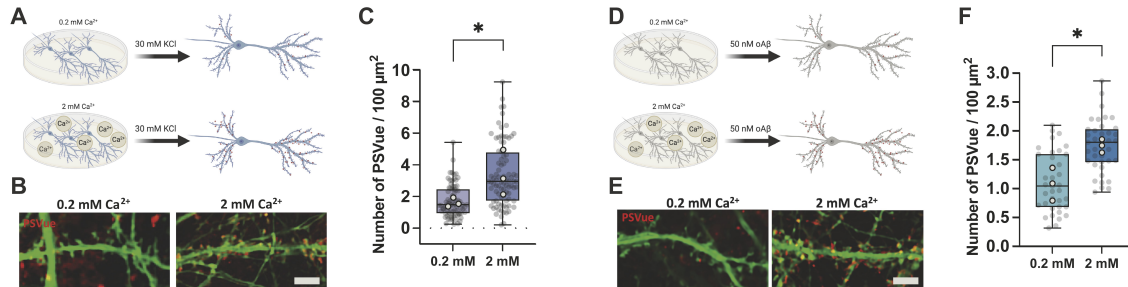

**Appendix Figure S3. A $\beta$  oligomer induced-PtdSer externalization is dependent on depolarization and calcium influx.**

- A.** Schematic figures of depolarization experiments at 0.2 or 2 mM calcium concentration.
- B.** Representative images of externalized PtdSer labelled with PSVue (red) in dendritic spines after depolarization with 30 mM KCl at each calcium concentration. Scale bar, 5  $\mu$ m.
- C.** Number of PSVue puncta per 100  $\mu$ m<sup>2</sup> at each condition. ~20-40 ROIs per experiment, from 3 independent experiments.
- D.** Schematic figures of experiments treated with A $\beta$  oligomer at 0.2 or 2 mM calcium concentration.
- E.** Representative images of externalized PtdSer after 50 nM A $\beta$  oligomer treatment at each calcium concentration. Scale bar, 5  $\mu$ m.
- F.** Number of PSVue puncta per 100  $\mu$ m<sup>2</sup> at each condition. ~10-20 ROIs per experiment, from 3 independent experiments.

Data information: Data shown as box plots (**C** and **F**). The top and the bottom of the boxes represent the 75<sup>th</sup> and 25<sup>th</sup> percentiles, respectively, and the lines in the middle represent the median. The whiskers represent the highest and lowest values that are not outliers. Each shaded point represents 1 ROI and each open point represents the mean for each independent experiment. Unpaired *t*-test *P*-values shown as \**P*<0.05.
